# Supplementary material
Source: bioRxiv or medRxiv preprint supplement (https://www.biorxiv.org/highwire/filestream/60721/field_highwire_adjunct_files/0/199612-1.pdf)

**Fig. S1**

Neurons

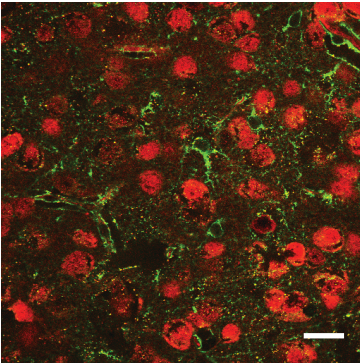

GSTT2/NeuN

Astrocytes

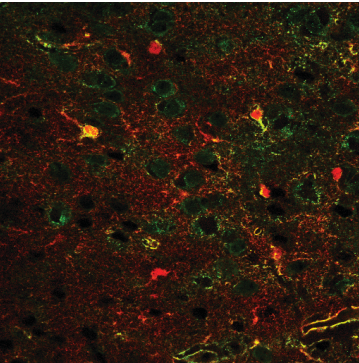

GSTT2/S100β

Oligodendrocytes

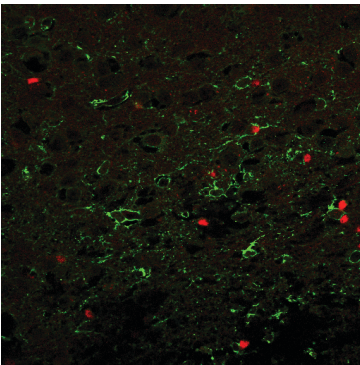

GSTT2/Olig2

Microglia

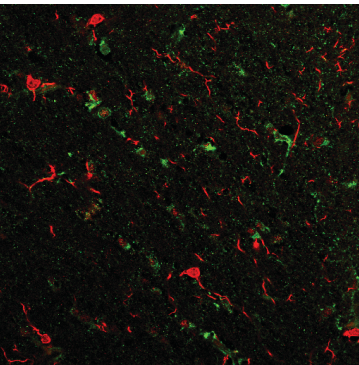

GSTT2/Iba1

**Fig. S2**

**A**

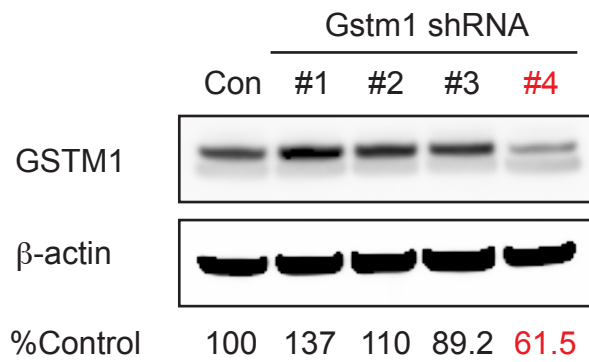

**B**

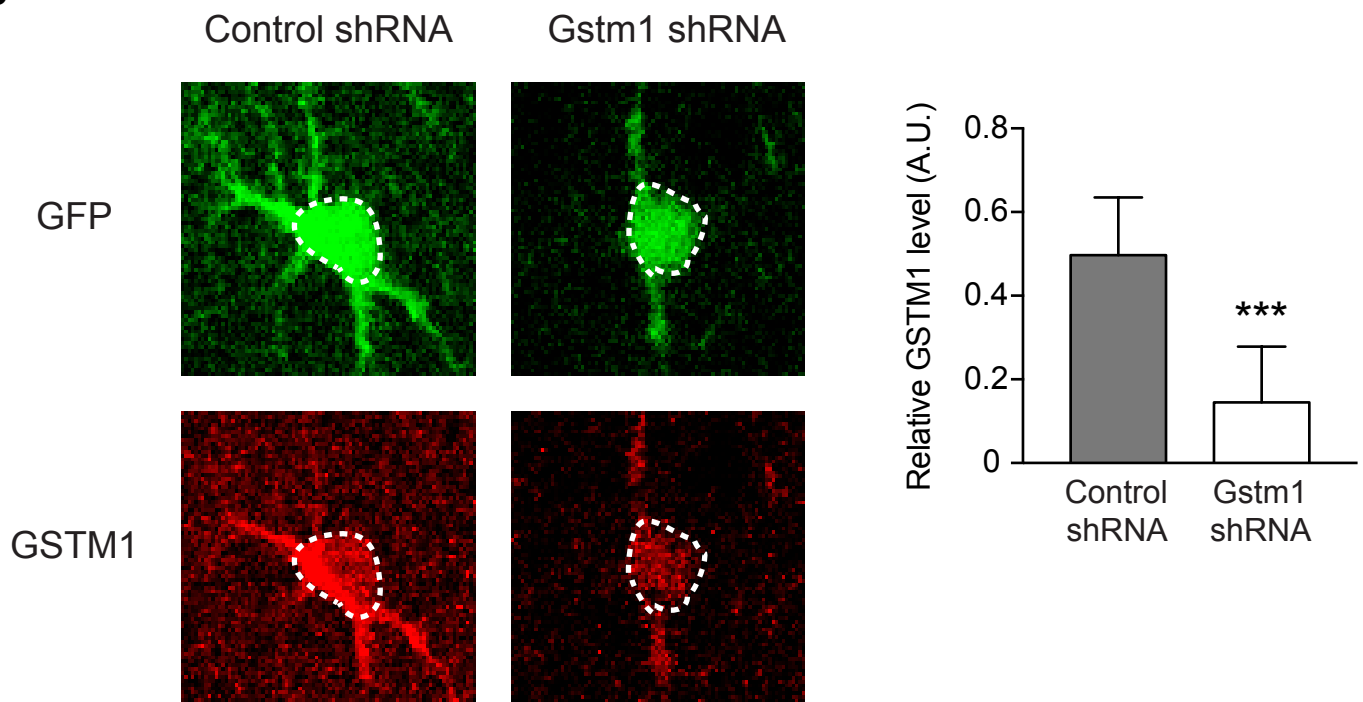

**C**

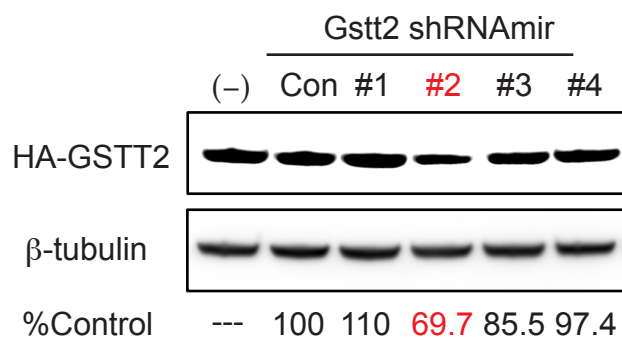

**Fig. S3**

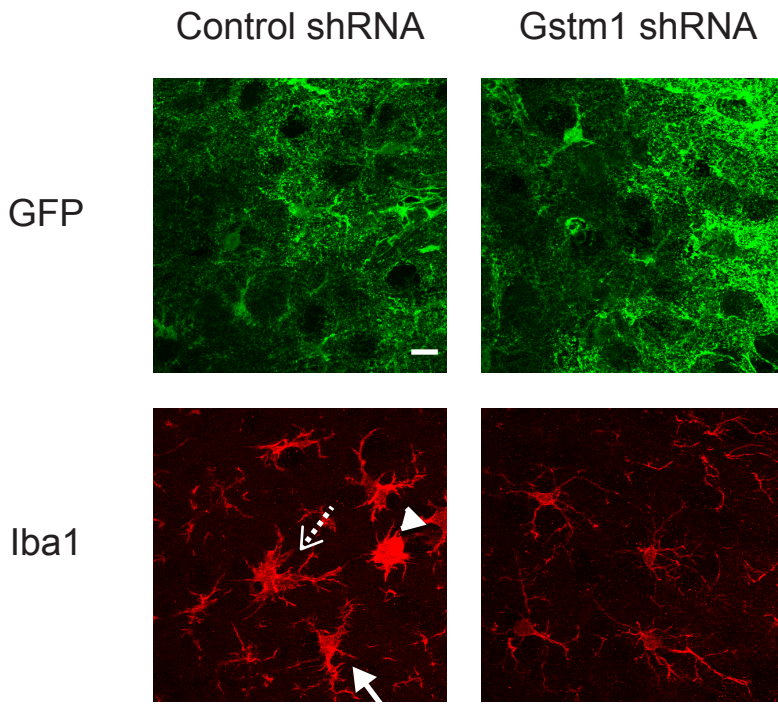

**Fig. S4**

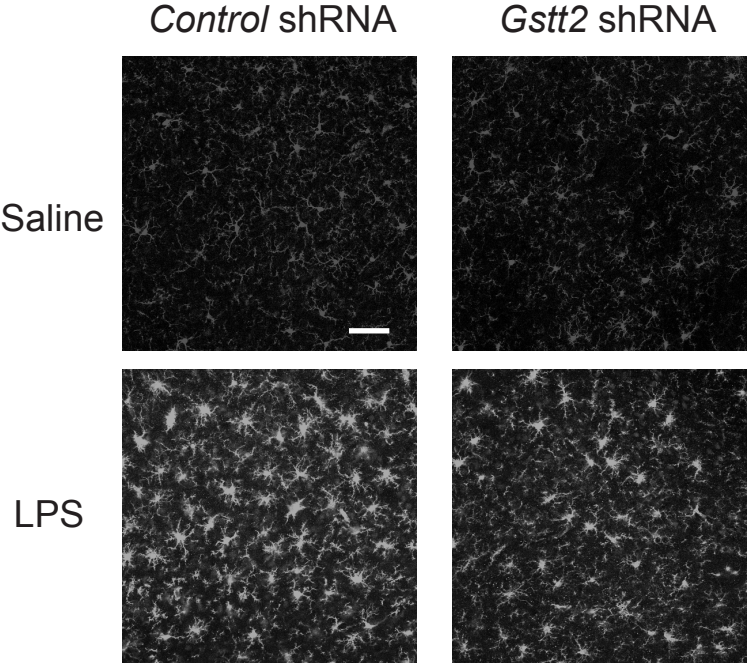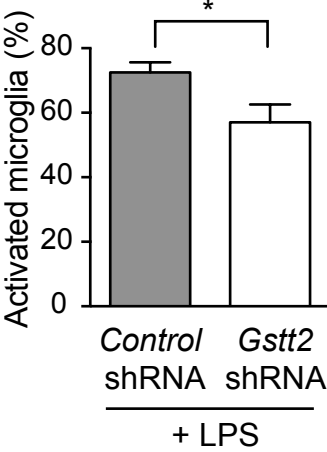

**Fig. S5**

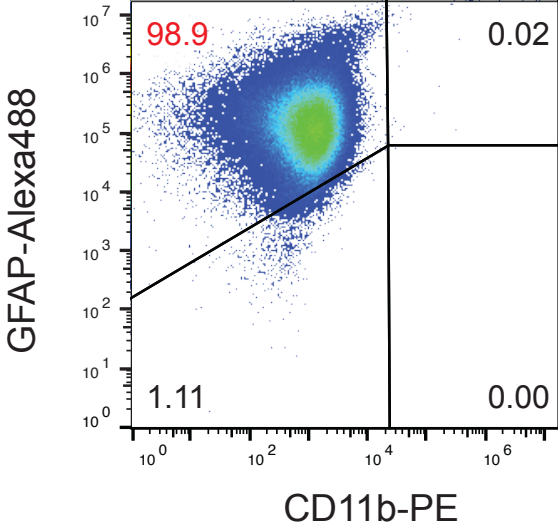

**Fig. S6**

**A**

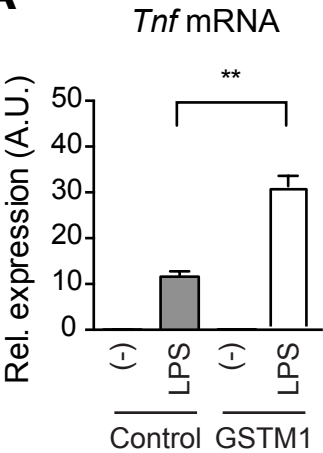

**B**

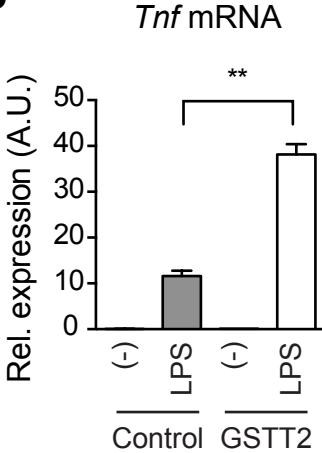

Supplement: Supplementary file [file 199612-1.pdf]
